# Supplementary material for: Somatic POLE exonuclease domain mutations elicit enhanced intratumoral immune responses in stage II colorectal cancer
Source: PubMed Central journal article supplement (PMC7454238; doi:10.1136/jitc-2020-000881), 2020-08-27

Figure 3S The MSI assessment by NGS for 3 patients with POLE mutations at exonuclease domains (the red bars are tumors, and the green bars are normal control)

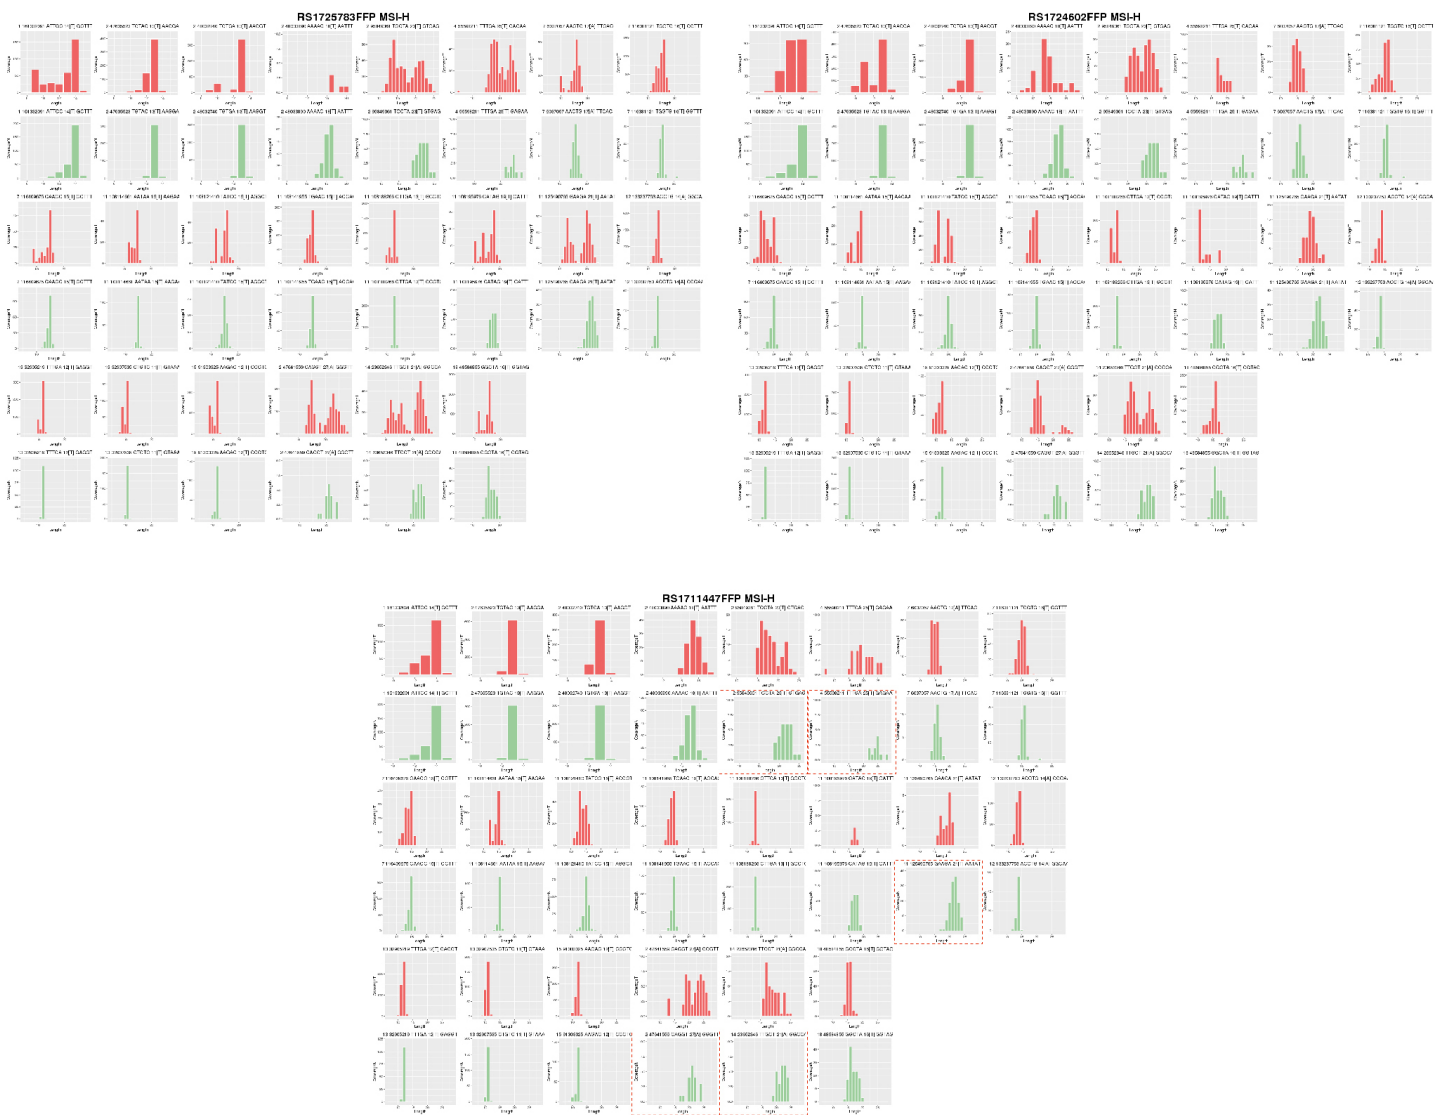

Supplement: jitc-2020-000881supp003.pdf [file jitc-2020-000881supp003.pdf]
