# Supplementary material for: Somatic POLE exonuclease domain mutations elicit enhanced intratumoral immune responses in stage II colorectal cancer
Source: PubMed Central journal article supplement (PMC7454238; doi:10.1136/jitc-2020-000881), 2020-08-27

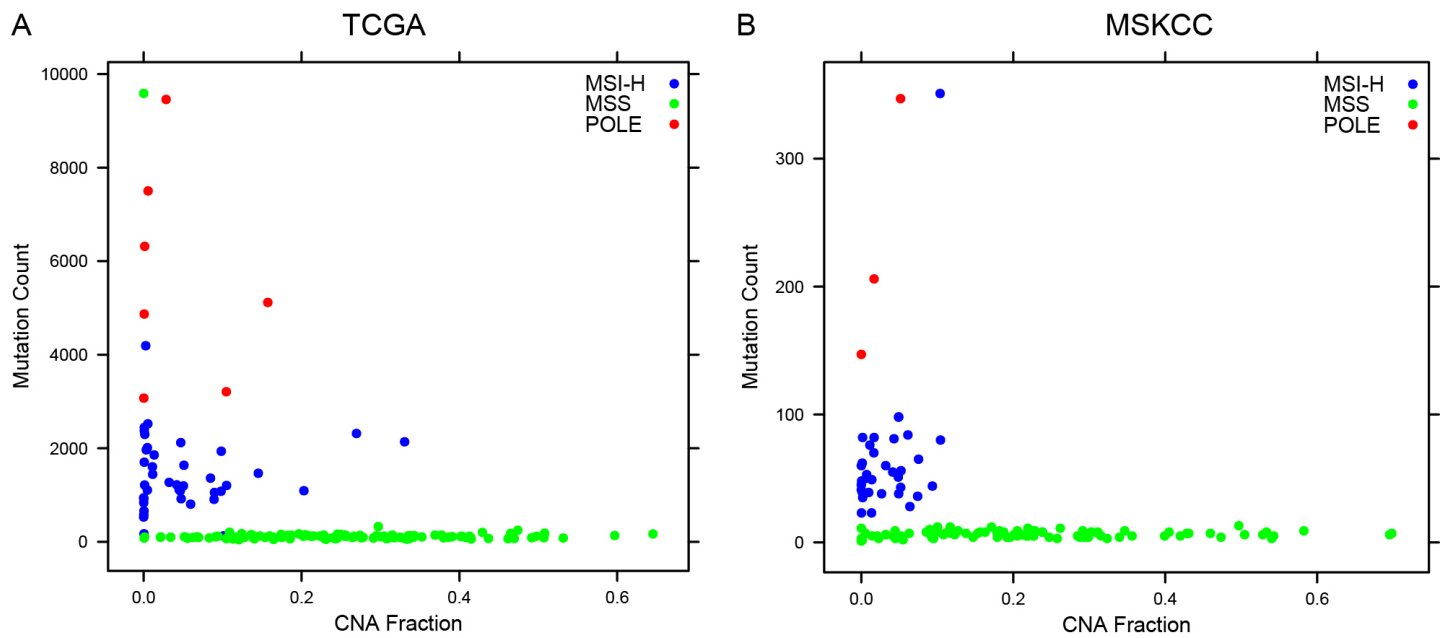

Supplement: jitc-2020-000881supp005.pdf [file jitc-2020-000881supp005.pdf]
