# Supplementary material for: Somatic POLE exonuclease domain mutations elicit enhanced intratumoral immune responses in stage II colorectal cancer
Source: PubMed Central journal article supplement (PMC7454238; doi:10.1136/jitc-2020-000881), 2020-08-27
Supplement: jitc-2020-000881supp006.pdf [file jitc-2020-000881supp006.pdf]

A

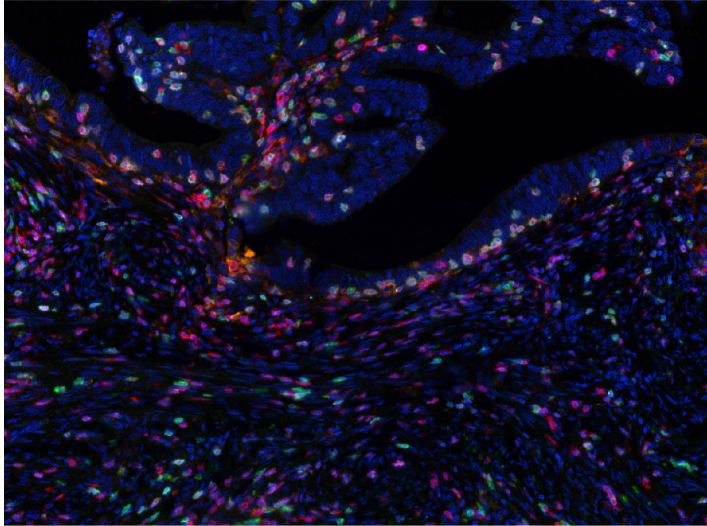

CD3 CD8 CD45RO PD-1 PD-L1 DAPI

B

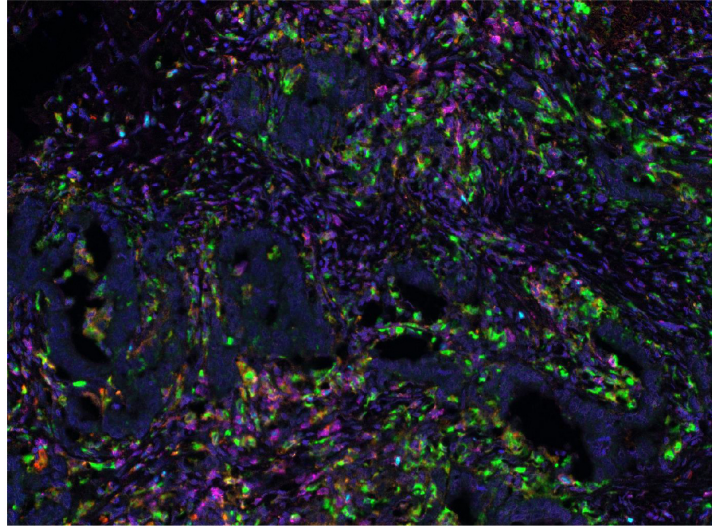

CD4 CD68 CD163 FOXP3 PD-L1 DAPI
