# Supplementary material for: Somatic POLE exonuclease domain mutations elicit enhanced intratumoral immune responses in stage II colorectal cancer
Source: PubMed Central journal article supplement (PMC7454238; doi:10.1136/jitc-2020-000881), 2020-08-27
Supplement: jitc-2020-000881supp007.pdf [file jitc-2020-000881supp007.pdf]

Supplementary Table 1. Demographic and clinicopathological characteristics according to stage II CRC POLE status in TCGA cohort.

| Characteristic          | POLE EDMs  | POLE wild-type & POLE non-EDMs | p value |
|-------------------------|------------|--------------------------------|---------|
| Total                   | 7 (3.8)    | 176 (96.2)                     | --      |
| Age (IQR)               | 59 (46-70) | 69 (60-78)                     | 0.049   |
| Year of diagnosis       |            |                                | 0.578   |
| 1998-2005               | 1 (14.3)   | 41 (23.3)                      |         |
| 2006-2013               | 6 (85.7)   | 135 (76.7)                     |         |
| Gender                  |            |                                | 0.305   |
| Female                  | 2 (28.6)   | 85 (48.3)                      |         |
| Male                    | 5 (71.4)   | 91 (51.7)                      |         |
| Histological type       |            |                                | 0.946   |
| Adenocarcinoma          | 6 (85.7)   | 153 (86.9)                     |         |
| Mucinous adenocarcinoma | 1 (14.3)   | 21 (11.9)                      |         |
| Unknown                 | 0 (0)      | 2 (1.2)                        |         |
| Location                |            |                                | 0.283   |
| Right                   | 3 (42.8)   | 74 (42.0)                      |         |
| Left                    | 2 (28.6)   | 85 (48.3)                      |         |
| Unknown                 | 2 (28.6)   | 17 (9.7)                       |         |
| pT stage                |            |                                | 0.024   |
| T3                      | 5 (71.4)   | 165 (93.8)                     |         |
| T4                      | 2 (28.6)   | 11 (6.2)                       |         |
| Venous invasion         |            |                                | 0.979   |
| Negative                | 5 (71.4)   | 120 (68.2)                     |         |
| Positive                | 1 (14.3)   | 30 (17.0)                      |         |
| Unknown                 | 1 (14.3)   | 26 (14.8)                      |         |
| Lymphatic invasion      |            |                                | 0.808   |
| Negative                | 4 (57.1)   | 119 (67.6)                     |         |
| Positive                | 2 (28.6)   | 42 (23.9)                      |         |
| Unknown                 | 1 (14.3)   | 15 (8.5)                       |         |
| Perineural invasion     |            |                                | 0.631   |
| Negative                | 2 (28.6)   | 55 (31.3)                      |         |
| Positive                | 0 (0)      | 18 (10.2)                      |         |
| Unknown                 | 5 (71.4)   | 103 (58.5)                     |         |
| LNH                     |            |                                | 0.885   |
| < 12                    | 1 (14.3)   | 20 (11.4)                      |         |
| ≥ 12                    | 5 (71.4)   | 139 (79.0)                     |         |
| Unknown                 | 1 (14.3)   | 17 (9.6)                       |         |
| MSI status              |            |                                | 0.355   |
| MSS                     | 7 (100)    | 134 (76.1)                     |         |
| MSI-H                   | 0 (0)      | 42 (23.9)                      |         |

CRC, colorectal cancer; EDM, exonuclease domain mutation; IQR, interquartile range; LNH,

number of lymph nodes harvested; MSI, microsatellite instability; MSS, microsatellite stabilization
