# Supplementary material for: Somatic POLE exonuclease domain mutations elicit enhanced intratumoral immune responses in stage II colorectal cancer
Source: PubMed Central journal article supplement (PMC7454238; doi:10.1136/jitc-2020-000881), 2020-08-27
Supplement: jitc-2020-000881supp008.pdf [file jitc-2020-000881supp008.pdf]

Supplementary Table 2. Demographic and clinicopathological characteristics according to stage II CRC POLE status in MSKCC cohort.

| Characteristic                | POLE EDMs  | POLE wild-type & POLE non-EDMs | p value |
|-------------------------------|------------|--------------------------------|---------|
| Total                         | 4 (3.0)    | 129 (97.0)                     | --      |
| Age (IQR)                     | 47 (31-59) | 59 (50-67)                     | 0.071   |
| Gender                        |            |                                | 0.054   |
| Female                        | 0 (0)      | 63 (48.8)                      |         |
| Male                          | 4 (100)    | 66 (51.2)                      |         |
| Tumor grade                   |            |                                | 0.063   |
| Moderate differentiation      | 2 (50.0)   | 83 (64.3)                      |         |
| Moderate-poor differentiation | 0 (0)      | 9 (7.0)                        |         |
| Poor differentiation          | 2 (50.0)   | 12 (9.3)                       |         |
| Unknown                       | 0 (0)      | 25 (19.4)                      |         |
| Location                      |            |                                | 0.856   |
| Right                         | 2 (50.0)   | 48 (37.2)                      |         |
| Left                          | 2 (50.0)   | 79 (61.2)                      |         |
| Unknown                       | 0 (0)      | 2 (1.6)                        |         |
| Sample type                   |            |                                | 0.098   |
| Primary                       | 4 (100)    | 76 (58.9)                      |         |
| Metastasis                    | 0 (0)      | 53 (41.1)                      |         |
| MSI status                    |            |                                | 0.898   |
| MSS                           | 3 (75.0)   | 93 (72.1)                      |         |
| MSI-H                         | 1 (25.0)   | 36 (27.9)                      |         |

CRC, colorectal cancer; EDM, exonuclease domain mutation; IQR, interquartile range; MSI, microsatellite instability; MSS, microsatellite stabilization
