# Supplementary material for: Somatic POLE exonuclease domain mutations elicit enhanced intratumoral immune responses in stage II colorectal cancer
Source: PubMed Central journal article supplement (PMC7454238; doi:10.1136/jitc-2020-000881), 2020-08-27
Supplement: jitc-2020-000881supp009.pdf [file jitc-2020-000881supp009.pdf]

Supplementary Table 3. Somatic POLE EDMs by NGS in stage II CRC.

| NGS-MSI status | POLE EDMs    |           |                            |       |         |
|----------------|--------------|-----------|----------------------------|-------|---------|
|                | Sample ID    | Exon rank | Mutation                   | TMB   | MMR-IHC |
| POLE EDMs      |              |           |                            |       |         |
| NGS-MSS        | RS1724514FFP | 9         | POLE_p.P286R;              | 499.2 | pMMR    |
| NGS-MSS        | RS1724574FFP | 9         | POLE_p.P286R;              | 204.8 | pMMR    |
| NGS-MSS        | RS1724507FFP | 9         | POLE_p.S297F               | 446.8 | pMMR    |
| NGS-MSS        | RS1711472FFP | 13        | POLE_p.V411L               | 174.6 | pMMR    |
| NGS-MSS        | RS1724566FFP | 14        | POLE_p.S459F               | 96    | pMMR    |
| NGS-MSS        | RS1724590FFP | 14        | POLE_p.A463P               | 54    | pMMR    |
| NGS-MSI-H      | RS1725783FFP | 10        | POLE_p.E311G               | 105.6 | pMMR    |
| NGS-MSI-H      | RS1724602FFP | 11        | POLE_p.G364W               | 81    | dMMR    |
| NGS-MSI-H      | RS1711447FFP | 13        | POLE_p.R413M; POLE_p.A448T | 145.2 | pMMR    |

EDM, exonuclease domain mutation; NGS, next-generation sequencing; CRC, colorectal cancer; MSI, microsatellite instability; MSS, microsatellite stabilization; TMB, tumor mutation burden; IHC, immunohistochemical; pMMR, proficient mismatch repair; dMMR, deficient mismatch repair
