# Supplementary material for: Somatic POLE exonuclease domain mutations elicit enhanced intratumoral immune responses in stage II colorectal cancer
Source: PubMed Central journal article supplement (PMC7454238; doi:10.1136/jitc-2020-000881), 2020-08-27
Supplement: jitc-2020-000881supp010.pdf [file jitc-2020-000881supp010.pdf]

Supplementary Table 4. List of 22 mutations analyzed in POLE gene.

| Patient ID   | Exon number | Mutations        |
|--------------|-------------|------------------|
| <b>FUSCC</b> |             |                  |
| RS1724514FFP | 9           | p.P286R          |
| RS1724574FFP | 9           | p.P286R          |
| RS1724507FFP | 9           | p.S297F          |
| RS1711472FFP | 13          | p.V411L          |
| RS1724566FFP | 14          | p.S459F          |
| RS1724590FFP | 14          | p.A463P          |
| RS1725783FFP | 10          | p.E311G          |
| RS1724602FFP | 11          | p.G364W          |
| RS1711447FFP | 13, 14      | p.R413M; p.A448T |
| <b>TCGA</b>  |             |                  |
| TCGA-AA-A010 | 13          | p.P436R          |
| TCGA-AA-A00N | 13          | p.V411L          |
| TCGA-AA-3984 | 13          | p.V411L          |
| TCGA-CA-6718 | 9           | p.P286R          |
| TCGA-AZ-4315 | 13          | p.V411L          |
| TCGA-F5-6814 | 9           | p.P286R          |
| TCGA-AA-3510 | 14          | p.A456P          |
| <b>MSKCC</b> |             |                  |
| P-0004865    | 9           | p.P286R          |
| P-0005824    | 9           | p.P286R          |
| P-0006960    | 11          | p.N363D          |
| P-0011357    | 9, 14       | p.D275G; p.S459F |
