# Supplementary material for: Somatic POLE exonuclease domain mutations elicit enhanced intratumoral immune responses in stage II colorectal cancer
Source: PubMed Central journal article supplement (PMC7454238; doi:10.1136/jitc-2020-000881), 2020-08-27
Supplement: jitc-2020-000881supp011.pdf [file jitc-2020-000881supp011.pdf]

Supplementary Table 5. Survival differences related to mutations of genes associated with CRC

| Variable | 5-year DFS        |         |
|----------|-------------------|---------|
|          | Log rank $\chi^2$ | P-value |
| RAS      | 0.159             | 0.690   |
| BRAF     | 2.071             | 0.150   |
| TP53     | 1.454             | 0.228   |
| APC      | 0.356             | 0.551   |
| PIK3CA   | 1.611             | 0.204   |
| PTEN     | 0.001             | 0.980   |
| MUTYH    | 0.559             | 0.455   |
| EpCAM    | 0.117             | 0.732   |
| ERBB2    | 0.263             | 0.608   |
| SMAD4    | 0.053             | 0.818   |
| MLH1     | 0.141             | 0.707   |
| MSH2     | 0.047             | 0.829   |
| MSH6     | 0.210             | 0.647   |
| PMS2     | 0.294             | 0.588   |

CRC, colorectal cancer; DFS, disease-free survival
