# Supplementary material for: Somatic POLE exonuclease domain mutations elicit enhanced intratumoral immune responses in stage II colorectal cancer
Source: PubMed Central journal article supplement (PMC7454238; doi:10.1136/jitc-2020-000881), 2020-08-27
Supplement: jitc-2020-000881supp012.pdf [file jitc-2020-000881supp012.pdf]

Supplementary Table 6. 37 CRC-related genes in ColonCore panel.

---

TP53  
KRAS  
MSH6  
MUTYH  
EPCAM  
MET  
ERBB2  
PIK3CA  
BRAF  
PTEN  
APC  
POLE  
POLD1  
BRCA1  
GALNT12  
ATM  
KIT  
CDH1  
PMS1  
BRCA2  
BMPR1A  
STK11  
MLH1  
PTCH1  
EGFR  
SMAD4  
NRAS  
PDGFRA  
SDHD  
BLM  
GREM1  
AKT1  
HRAS  
MSH2  
CHEK2  
PMS2  
SDHB

---
