# Supplementary material for: Somatic POLE exonuclease domain mutations elicit enhanced intratumoral immune responses in stage II colorectal cancer
Source: PubMed Central journal article supplement (PMC7454238; doi:10.1136/jitc-2020-000881), 2020-08-27
Supplement: jitc-2020-000881supp013.pdf [file jitc-2020-000881supp013.pdf]

Supplementary Table 7. Gene list of 520 genes.

| Gene    | NGS              | CNV | TransID        |
|---------|------------------|-----|----------------|
| ABL1    | wholeExon        | Y   | NM_005157.5    |
| ABL2    | selectedExon     | Y   | NM_007314.3    |
| ACVR1   | selectedExon     | Y   | NM_001105.4    |
| ACVR1B  | selectedExon     | Y   | NM_020328.3    |
| ADGRA2  | selectedExon     | Y   | NM_032777.9    |
| AKT1    | wholeExon        | Y   | NM_001014432.1 |
| AKT2    | wholeExon        | Y   | NM_001626.5    |
| AKT3    | wholeExon        | Y   | NM_005465.4    |
| ALK     | wholeExon/fusion | Y   | NM_004304.4    |
| ALOX12B | selectedExon     | Y   | NM_001139.2    |
| ANKRD11 | selectedExon     | Y   | NM_001256182.1 |
| APC     | wholeExon        | Y   | NM_000038.5    |
| AR      | wholeExon        | Y   | NM_000044.3    |
| ARAF    | wholeExon        | Y   | NM_001256196.1 |
| ARID1A  | wholeExon        | Y   | NM_006015.4    |
| ARID1B  | wholeExon        | Y   | NM_020732.3    |
| ARID2   | wholeExon        | Y   | NM_152641.2    |
| ARID5B  | selectedExon     | Y   | NM_032199.2    |
| ASXL1   | wholeExon        | Y   | NM_015338.5    |
| ASXL2   | selectedExon     | Y   | NM_018263.4    |
| ATF1    | selectedExon     | Y   | NM_005171.4    |
| ATM     | wholeExon        | Y   | NM_000051.3    |
| ATR     | wholeExon        | Y   | NM_001184.3    |
| ATRX    | wholeExon        | Y   | NM_000489.4    |
| AURKA   | wholeExon        | Y   | NM_001323303.1 |
| AURKB   | wholeExon        | Y   | NM_001284526.1 |
| AXIN1   | wholeExon        | Y   | NM_003502.3    |
| AXIN2   | selectedExon     | Y   | NM_004655.3    |
| AXL     | wholeExon        | Y   | NM_021913.4    |
| B2M     | selectedExon     | Y   | NM_004048.2    |
| BAP1    | wholeExon        | Y   | NM_004656.3    |
| BARD1   | wholeExon        | Y   | NM_000465.3    |
| BCL2    | wholeExon        | Y   | NM_000633.2    |
| BCL2L1  | wholeExon        | Y   | NM_001317919.1 |
| BCL6    | wholeExon        | Y   | NM_001130845.1 |
| BCOR    | wholeExon        | Y   | NM_001123383.1 |
| BCORL1  | selectedExon     | Y   | NM_021946.4    |
| BCR     | fusion           | Y   | NM_004327.3    |

|        |                  |   |                |
|--------|------------------|---|----------------|
| BIRC3  | selectedExon     | Y | NM_001165.4    |
| BLM    | wholeExon        | Y | NM_000057.3    |
| BMPR1A | selectedExon     | Y | NM_004329.2    |
| BRAF   | wholeExon/fusion | Y | NM_004333.4    |
| BRCA1  | wholeExon        | Y | NM_007294.3    |
| BRCA2  | wholeExon        | Y | NM_000059.3    |
| BRD4   | wholeExon        | Y | NM_058243.2    |
| BRIP1  | wholeExon        | Y | NM_032043.2    |
| BTK    | wholeExon        | Y | NM_000061.2    |
| CARD11 | wholeExon        | Y | NM_032415.5    |
| CASP8  | selectedExon     | Y | NM_001228.4    |
| CBFB   | wholeExon        | Y | NM_022845.2    |
| CBL    | wholeExon        | Y | NM_005188.3    |
| CCND1  | wholeExon/SNPCNV | Y | NM_053056.2    |
| CCND2  | wholeExon        | Y | NM_001759.3    |
| CCND3  | wholeExon        | Y | NM_001760.4    |
| CCNE1  | wholeExon        | Y | NM_001238.3    |
| CD274  | wholeExon/UTR    | Y | NM_014143.3    |
| CD79A  | wholeExon        | Y | NM_001783.3    |
| CD79B  | wholeExon        | Y | NM_001039933.2 |
| CDC73  | wholeExon        | Y | NM_024529.4    |
| CDH1   | wholeExon        | Y | NM_004360.4    |
| CDK12  | wholeExon        | Y | NM_016507.3    |
| CDK4   | wholeExon/SNPCNV | Y | NM_000075.3    |
| CDK6   | wholeExon/SNPCNV | Y | NM_001145306.1 |
| CDK8   | wholeExon        | Y | NM_001260.2    |
| CDKN1A | wholeExon        | Y | NM_001291549.1 |
| CDKN1B | wholeExon        | Y | NM_004064.4    |
| CDKN1C | wholeExon        | Y | NM_000076.2    |
| CDKN2A | wholeExon        | Y | NM_000077.4    |
| CDKN2B | wholeExon        | Y | NM_004936.3    |
| CDKN2C | wholeExon        | Y | NM_001262.2    |
| CEBPA  | wholeExon        | Y | NM_004364.4    |
| CHD1   | wholeExon        | Y | NM_001270.2    |
| CHD2   | selectedExon     | Y | NM_001271.3    |
| CHD4   | selectedExon     | Y | NM_001273.3    |
| CHEK1  | wholeExon        | Y | NM_001114121.2 |
| CHEK2  | wholeExon        | Y | NM_007194.3    |
| CHUK   | selectedExon     | Y | NM_001278.4    |
| CIC    | wholeExon        | Y | NM_015125.4    |

|              |                  |   |                |
|--------------|------------------|---|----------------|
| CREBBP       | wholeExon        | Y | NM_004380.2    |
| CRKL         | wholeExon        | Y | NM_005207.3    |
| CRLF2        | wholeExon        | Y | NM_022148.3    |
| CSF1R        | wholeExon        | Y | NM_001288705.1 |
| CSF3R        | selectedExon     | Y | NM_156039.3    |
| CTCF         | wholeExon        | Y | NM_006565.3    |
| CTNNB1       | wholeExon        | Y | NM_001904.3    |
| CUL3         | wholeExon        | Y | NM_001257198.1 |
| CUL4A        | selectedExon     | Y | NM_001008895.2 |
| CUL4B        | selectedExon     | Y | NM_003588.3    |
| CYLD         | selectedExon     | Y | NM_015247.2    |
| DAXX         | wholeExon        | Y | NM_001141970.1 |
| DDR2         | wholeExon        | Y | NM_001014796.1 |
| DICER1       | wholeExon        | Y | NM_177438.2    |
| DNMT1        | selectedExon     | Y | NM_001130823.2 |
| DNMT3A       | wholeExon        | Y | NM_022552.4    |
| DNMT3B       | selectedExon     | Y | NM_006892.3    |
| DOT1L        | wholeExon        | Y | NM_032482.2    |
| <i>EGFR</i>  | wholeExon/SNPCNV | Y | NM_005228.3    |
| EIF4E        | selectedExon     | Y | NM_001130679.1 |
| ELOC         | selectedExon     | Y | NM_020341.3    |
| EMSY         | wholeExon        | Y | NM_001300942.1 |
| EP300        | wholeExon        | Y | NM_001429.3    |
| EPCAM        | selectedExon     | Y | NM_002354.2    |
| EPHA2        | selectedExon     | Y | NM_004431.4    |
| EPHA3        | wholeExon        | Y | NM_005233.5    |
| EPHA5        | wholeExon        | Y | NM_001281765.2 |
| EPHA7        | wholeExon        | Y | NM_004440.3    |
| EPHB1        | wholeExon        | Y | NM_004441.4    |
| <i>ERBB2</i> | wholeExon/SNPCNV | Y | NM_004448.3    |
| ERBB3        | wholeExon        | Y | NM_001982.3    |
| ERBB4        | wholeExon/fusion | Y | NM_005235.2    |
| ERCC1        | wholeExon        | Y | NM_202001.2    |
| ERCC2        | selectedExon     | Y | NM_000400.3    |
| ERG          | wholeExon        | Y | NM_001136154.1 |
| ERRFI1       | wholeExon        | Y | NM_018948.3    |
| ESR1         | wholeExon        | Y | NM_000125.3    |
| EWSR1        | fusion           | Y | NM_013986.3    |
| EZH2         | wholeExon        | Y | NM_004456.4    |
| FAM175A      | wholeExon        | Y | NM_139076.2    |

|              |                  |   |                |
|--------------|------------------|---|----------------|
| FANCA        | wholeExon        | Y | NM_000135.2    |
| FANCC        | wholeExon        | Y | NM_000136.2    |
| FANCD2       | wholeExon        | Y | NM_001018115.2 |
| FANCE        | wholeExon        | Y | NM_021922.2    |
| FANCG        | wholeExon        | Y | NM_004629.1    |
| FANCI        | wholeExon        | Y | NM_001113378.1 |
| FANCL        | wholeExon        | Y | NM_001114636.1 |
| FAT1         | wholeExon        | Y | NM_005245.3    |
| FAT3         | wholeExon        | Y | NM_001008781.2 |
| FBXW7        | wholeExon        | Y | NM_033632.3    |
| FCGR2B       | selectedExon     | Y | NM_004001.4    |
| FGF12        | selectedExon     | Y | NM_021032.4    |
| FGF14        | selectedExon     | Y | NM_175929.2    |
| <i>FGF19</i> | wholeExon/SNPCNV | Y | NM_005117.2    |
| <i>FGF3</i>  | wholeExon/SNPCNV | Y | NM_005247.2    |
| <i>FGF4</i>  | wholeExon/SNPCNV | Y | NM_002007.2    |
| FGFR1        | wholeExon/fusion | Y | NM_023110.2    |
| FGFR2        | wholeExon/fusion | Y | NM_000141.4    |
| FGFR3        | wholeExon/fusion | Y | NM_000142.4    |
| FGFR4        | wholeExon        | Y | NM_002011.4    |
| FH           | wholeExon        | Y | NM_000143.3    |
| FLCN         | wholeExon        | Y | NM_144997.5    |
| FLT1         | wholeExon        | Y | NM_002019.4    |
| FLT3         | wholeExon        | Y | NM_004119.2    |
| FLT4         | wholeExon        | Y | NM_182925.4    |
| FOXO1        | wholeExon        | Y | NM_002015.3    |
| FOXP1        | wholeExon        | Y | NM_001244810.1 |
| FRS2         | selectedExon     | Y | NM_001042555.2 |
| FUBP1        | wholeExon        | Y | NM_003902.4    |
| FYN          | selectedExon     | Y | NM_002037.5    |
| GABRA6       | selectedExon     | Y | NM_000811.2    |
| GALNT12      | wholeExon        | Y | NM_024642.4    |
| GATA1        | wholeExon        | Y | NM_002049.3    |
| GATA2        | wholeExon        | Y | NM_001145661.1 |
| GATA3        | wholeExon        | Y | NM_001002295.1 |
| GATA6        | selectedExon     | Y | NM_005257.5    |
| GLI1         | wholeExon        | Y | NM_005269.2    |
| GNA11        | wholeExon        | Y | NM_002067.4    |
| GNAQ         | wholeExon        | Y | NM_002072.4    |
| GNAS         | wholeExon        | Y | NM_080425.3    |

|          |              |   |                |
|----------|--------------|---|----------------|
| GRIN2A   | wholeExon    | Y | NM_000833.4    |
| GRM3     | wholeExon    | Y | NM_000840.2    |
| GSK3B    | wholeExon    | Y | NM_002093.3    |
| GSTM1    | wholeExon    | Y | NM_000561.3    |
| GSTT1    | wholeExon    | Y | NM_000853.3    |
| H3F3A    | wholeExon    | Y | NM_002107.4    |
| HDAC1    | selectedExon | Y | NM_004964.2    |
| HDAC2    | selectedExon | Y | NM_001527.3    |
| HDAC4    | selectedExon | Y | NM_006037.3    |
| HGF      | wholeExon    | Y | NM_000601.5    |
| HIST1H3F | selectedExon | Y | NM_021018.2    |
| HLA-A    | selectedExon | Y | NM_001242758.1 |
| HNF1A    | wholeExon    | Y | NM_000545.6    |
| HNF1B    | wholeExon    | Y | NM_000458.3    |
| HRAS     | wholeExon    | Y | NM_005343.3    |
| HSP90AA1 | selectedExon | Y | NM_001017963.2 |
| IDH1     | wholeExon    | Y | NM_005896.3    |
| IDH2     | wholeExon    | Y | NM_001289910.1 |
| IGF1     | selectedExon | Y | NM_001111285.2 |
| IGF1R    | wholeExon    | Y | NM_000875.4    |
| IGF2     | wholeExon    | Y | NM_000612.5    |
| IKBKE    | wholeExon    | Y | NM_014002.3    |
| IKZF1    | wholeExon    | Y | NM_006060.5    |
| IL7R     | wholeExon    | Y | NM_002185.3    |
| INHBA    | wholeExon    | Y | NM_002192.3    |
| INPP4A   | selectedExon | Y | NM_001134224.1 |
| INPP4B   | wholeExon    | Y | NM_001101669.1 |
| INSR     | selectedExon | Y | NM_000208.3    |
| IRF2     | selectedExon | Y | NM_002199.3    |
| IRF4     | wholeExon    | Y | NM_002460.3    |
| IRS2     | wholeExon    | Y | NM_003749.2    |
| JAK1     | wholeExon    | Y | NM_001320923.1 |
| JAK2     | wholeExon    | Y | NM_004972.3    |
| JAK3     | wholeExon    | Y | NM_000215.3    |
| KAT6A    | selectedExon | Y | NM_006766.4    |
| KDM5A    | wholeExon    | Y | NM_001042603.2 |
| KDM5C    | wholeExon    | Y | NM_004187.3    |
| KDM6A    | wholeExon    | Y | NM_001291415.1 |
| KDR      | wholeExon    | Y | NM_002253.2    |
| KEAP1    | wholeExon    | Y | NM_012289.3    |

|         |                         |   |                |
|---------|-------------------------|---|----------------|
| KEL     | selectedExon            | Y | NM_000420.2    |
| KIT     | wholeExon               | Y | NM_000222.2    |
| KMT2A   | wholeExon               | Y | NM_001197104.1 |
| KMT2C   | wholeExon               | Y | NM_170606.2    |
| KMT2D   | wholeExon               | Y | NM_003482.3    |
| KRAS    | wholeExon/SNPCNV        | Y | NM_033360.3    |
| LATS1   | wholeExon               | Y | NM_004690.3    |
| LATS2   | selectedExon            | Y | NM_014572.2    |
| LMO1    | wholeExon               | Y | NM_002315.2    |
| LRP1B   | wholeExon               | Y | NM_018557.2    |
| MAGI2   | selectedExon            | Y | NM_012301.3    |
| MAP2K1  | wholeExon               | Y | NM_002755.3    |
| MAP2K2  | wholeExon               | Y | NM_030662.3    |
| MAP2K4  | wholeExon               | Y | NM_001281435.1 |
| MAP3K1  | wholeExon               | Y | NM_005921.1    |
| MAP3K13 | selectedExon            | Y | NM_001242314.1 |
| MAPK3   | selectedExon            | Y | NM_002746.2    |
| MAX     | selectedExon            | Y | NM_002382.4    |
| MCL1    | wholeExon               | Y | NM_021960.4    |
| MDC1    | selectedExon            | Y | NM_014641.2    |
| MDM2    | wholeExon               | Y | NM_002392.5    |
| MDM4    | wholeExon               | Y | NM_002393.4    |
| MED12   | wholeExon               | Y | NM_005120.2    |
| MEF2B   | wholeExon               | Y | NM_001145785.1 |
| MEN1    | wholeExon               | Y | NM_000244.3    |
| MET     | wholeExon/fusion/SNPCNV | Y | NM_000245.3    |
| MITF    | wholeExon               | Y | NM_000248.3    |
| MLH1    | wholeExon               | Y | NM_000249.3    |
| MLH3    | wholeExon               | Y | NM_001040108.1 |
| MPL     | wholeExon               | Y | NM_005373.2    |
| MRE11A  | wholeExon               | Y | NM_005591.3    |
| MSH2    | wholeExon               | Y | NM_000251.2    |
| MSH3    | wholeExon               | Y | NM_002439.4    |
| MSH6    | wholeExon               | Y | NM_000179.2    |
| MST1    | selectedExon            | Y | NM_020998.3    |
| MST1R   | selectedExon            | Y | NM_002447.3    |
| MTOR    | wholeExon               | Y | NM_004958.3    |
| MUTYH   | wholeExon               | Y | NM_001128425.1 |
| MYC     | wholeExon               | Y | NM_002467.4    |
| MYCL    | wholeExon               | Y | NM_001033082.2 |

|         |                  |   |                |
|---------|------------------|---|----------------|
| MYCN    | wholeExon        | Y | NM_001293228.1 |
| MYD88   | wholeExon        | Y | NM_001172567.1 |
| NBN     | wholeExon        | Y | NM_002485.4    |
| NCOR1   | selectedExon     | Y | NM_006311.3    |
| NEB     | selectedExon     | Y | NM_001271208.1 |
| NF1     | wholeExon        | Y | NM_000267.3    |
| NF2     | wholeExon        | Y | NM_000268.3    |
| NFE2L2  | wholeExon        | Y | NM_006164.4    |
| NFKBIA  | wholeExon        | Y | NM_020529.2    |
| NKX2-1  | wholeExon        | Y | NM_001079668.2 |
| NOTCH1  | wholeExon        | Y | NM_017617.4    |
| NOTCH2  | wholeExon        | Y | NM_024408.3    |
| NOTCH3  | wholeExon        | Y | NM_000435.2    |
| NOTCH4  | selectedExon     | Y | NM_004557.3    |
| NPM1    | wholeExon        | Y | NM_002520.6    |
| NR4A3   | selectedExon     | Y | NM_173200.2    |
| NRAS    | wholeExon        | Y | NM_002524.4    |
| NRG1    | fusion           | Y | NM_001322205.1 |
| NSD1    | wholeExon        | Y | NM_022455.4    |
| NTHL1   | wholeExon        | Y | NM_002528.6    |
| NTRK1   | wholeExon/fusion | Y | NM_001007792.1 |
| NTRK2   | wholeExon/fusion | Y | NM_006180.4    |
| NTRK3   | wholeExon/fusion | Y | NM_001012338.2 |
| NUP93   | wholeExon        | Y | NM_014669.4    |
| PAK1    | selectedExon     | Y | NM_001128620.1 |
| PAK3    | selectedExon     | Y | NM_001128168.2 |
| PAK7    | selectedExon     | Y | NM_020341.3    |
| PALB2   | wholeExon        | Y | NM_024675.3    |
| PARK2   | wholeExon        | Y | NM_004562.2    |
| PARP2   | selectedExon     | Y | NM_005484.3    |
| PARP3   | selectedExon     | Y | NM_001003931.3 |
| PARP4   | selectedExon     | Y | NM_006437.3    |
| PAX5    | wholeExon        | Y | NM_016734.2    |
| PBRM1   | wholeExon        | Y | NM_018313.4    |
| PDGFRA  | wholeExon        | Y | NM_006206.4    |
| PDGFRB  | wholeExon        | Y | NM_002609.3    |
| PGR     | selectedExon     | Y | NM_000926.4    |
| PIK3C2G | selectedExon     | Y | NM_001288772.1 |
| PIK3CA  | wholeExon        | Y | NM_006218.3    |
| PIK3CB  | wholeExon        | Y | NM_006219.2    |

|         |                  |   |                |
|---------|------------------|---|----------------|
| PIK3CD  | selectedExon     | Y | NM_005026.3    |
| PIK3CG  | wholeExon        | Y | NM_001282426.1 |
| PIK3R1  | wholeExon        | Y | NM_181523.2    |
| PIK3R2  | wholeExon        | Y | NM_005027.3    |
| PIM1    | selectedExon     | Y | NM_001243186.1 |
| PLCG2   | wholeExon        | Y | NM_002661.4    |
| PMS1    | wholeExon        | Y | NM_000534.4    |
| PMS2    | wholeExon        | Y | NM_000535.6    |
| POLD1   | wholeExon        | Y | NM_001256849.1 |
| POLE    | wholeExon        | Y | NM_006231.3    |
| PPP2R1A | wholeExon        | Y | NM_014225.5    |
| PPP2R2A | wholeExon        | Y | NM_001177591.1 |
| PPP6C   | selectedExon     | Y | NM_001123355.1 |
| PRDM1   | wholeExon        | Y | NM_001198.3    |
| PREX2   | selectedExon     | Y | NM_024870.3    |
| PRKAR1A | wholeExon        | Y | NM_002734.4    |
| PRKDC   | wholeExon        | Y | NM_006904.6    |
| PTCH1   | wholeExon        | Y | NM_000264.3    |
| PTEN    | wholeExon        | Y | NM_000314.6    |
| PTK2    | selectedExon     | Y | NM_005607.4    |
| PTPN11  | wholeExon        | Y | NM_002834.3    |
| PTPRD   | wholeExon        | Y | NM_002839.3    |
| PTPRS   | selectedExon     | Y | NM_002850.3    |
| PTPRT   | selectedExon     | Y | NM_133170.3    |
| QKI     | selectedExon     | Y | NM_006775.2    |
| RAC1    | wholeExon        | Y | NM_018890.3    |
| RAD50   | wholeExon        | Y | NM_005732.3    |
| RAD51   | wholeExon        | Y | NM_001164269.1 |
| RAD51B  | wholeExon        | Y | NM_001321821.1 |
| RAD51C  | wholeExon        | Y | NM_058216.2    |
| RAD51D  | wholeExon        | Y | NM_002878.3    |
| RAD52   | wholeExon        | Y | NM_001297419.1 |
| RAD54L  | wholeExon        | Y | NM_001142548.1 |
| RAF1    | wholeExon        | Y | NM_002880.3    |
| RARA    | wholeExon        | Y | NM_000964.3    |
| RASA1   | selectedExon     | Y | NM_002890.2    |
| RB1     | wholeExon        | Y | NM_000321.2    |
| RBM10   | wholeExon        | Y | NM_001204468.1 |
| RECQL4  | selectedExon     | Y | NM_004260.3    |
| RET     | wholeExon/fusion | Y | NM_020975.4    |



|         |                  |   |                |
|---------|------------------|---|----------------|
| RHOA    | selectedExon     | Y | NM_001664.3    |
| RICTOR  | wholeExon        | Y | NM_001285439.1 |
| RNF43   | wholeExon        | Y | NM_017763.5    |
| ROS1    | wholeExon/fusion | Y | NM_002944.2    |
| RPS6KA4 | selectedExon     | Y | NM_003942.2    |
| RPS6KB2 | selectedExon     | Y | NM_003952.2    |
| RPTOR   | wholeExon        | Y | NM_020761.2    |
| RUNX1   | wholeExon        | Y | NM_001754.4    |
| RUNX1T1 | selectedExon     | Y | NM_001198679.1 |
| SDHA    | wholeExon        | Y | NM_004168.3    |
| SDHB    | wholeExon        | Y | NM_003000.2    |
| SDHC    | wholeExon        | Y | NM_003001.3    |
| SDHD    | wholeExon        | Y | NM_003002.3    |
| SETD2   | wholeExon        | Y | NM_014159.6    |
| SF3B1   | wholeExon        | Y | NM_001005526.2 |
| SH2B3   | selectedExon     | Y | NM_005475.2    |
| SLIT2   | selectedExon     | Y | NM_004787.3    |
| SLX4    | wholeExon        | Y | NM_032444.2    |
| SMAD2   | wholeExon        | Y | NM_001003652.3 |
| SMAD3   | wholeExon        | Y | NM_005902.3    |
| SMAD4   | wholeExon        | Y | NM_005359.5    |
| SMARCA4 | wholeExon        | Y | NM_001128849.1 |
| SMARCB1 | wholeExon        | Y | NM_003073.4    |
| SMARCD1 | selectedExon     | Y | NM_003076.4    |
| SMO     | wholeExon        | Y | NM_005631.4    |
| SNCAIP  | selectedExon     | Y | NM_001308100.1 |
| SOX9    | wholeExon        | Y | NM_000346.3    |
| SPEN    | wholeExon        | Y | NM_015001.2    |
| SPOP    | wholeExon        | Y | NM_001007226.1 |
| SPTA1   | wholeExon        | Y | NM_003126.2    |
| SRC     | wholeExon        | Y | NM_198291.2    |
| SRSF2   | wholeExon        | Y | NM_003016.4    |
| STAG2   | wholeExon        | Y | NM_001042749.2 |
| STAT3   | wholeExon        | Y | NM_139276.2    |
| STAT5A  | selectedExon     | Y | NM_001288718.1 |
| STAT5B  | wholeExon        | Y | NM_012448.3    |
| STK11   | wholeExon        | Y | NM_000455.4    |
| STK40   | selectedExon     | Y | NM_001282546.1 |
| SUFU    | wholeExon        | Y | NM_016169.3    |
| SYK     | wholeExon        | Y | NM_001174167.2 |

|          |                    |   |                |
|----------|--------------------|---|----------------|
| TAF1     | selectedExon       | Y | NM_001286074.1 |
| TBX3     | wholeExon          | Y | NM_016569.3    |
| TCF3     | selectedExon       | Y | NM_003200.3    |
| TCF7L2   | selectedExon       | Y | NM_001146274.1 |
| TERT     | wholeExon/Promoter | Y | NM_198253.2    |
| TET2     | wholeExon          | Y | NM_001127208.2 |
| TGFBR2   | wholeExon          | Y | NM_001024847.2 |
| TMPRSS2  | fusion             | Y | NM_001135099.1 |
| TNFAIP3  | wholeExon          | Y | NM_001270507.1 |
| TNFRSF14 | wholeExon          | Y | NM_003820.3    |
| TNFSF11  | wholeExon          | Y | NM_003701.3    |
| TOP1     | wholeExon          | Y | NM_003286.2    |
| TP53     | wholeExon          | Y | NM_000546.5    |
| TP63     | wholeExon          | Y | NM_003722.4    |
| TRAF2    | selectedExon       | Y | NM_021138.3    |
| TRAF7    | selectedExon       | Y | NM_032271.2    |
| TRRAP    | selectedExon       | Y | NM_001244580.1 |
| TSC1     | wholeExon          | Y | NM_000368.4    |
| TSC2     | wholeExon          | Y | NM_000548.4    |
| TSHR     | wholeExon          | Y | NM_000369.2    |
| U2AF1    | wholeExon          | Y | NM_001025203.1 |
| VEGFA    | wholeExon          | Y | NM_001025366.2 |
| VHL      | wholeExon          | Y | NM_000551.3    |
| WRN      | wholeExon          | Y | NM_000553.4    |
| WT1      | wholeExon          | Y | NM_024426.4    |
| XPO1     | wholeExon          | Y | NM_003400.3    |
| XRCC2    | wholeExon          | Y | NM_005431.1    |
| YES1     | selectedExon       | Y | NM_005433.3    |
| ZFHX3    | selectedExon       | Y | NM_006885.3    |
| ZNF217   | selectedExon       | Y | NM_006526.2    |
| ZNF703   | selectedExon       | Y | NM_025069.2    |
| ZNRF3    | selectedExon       | Y | NM_001206998.1 |
| AMER1    | wholeExon          | N | NM_152424.3    |
| APCDD1   | selectedExon       | N | NM_153000.4    |
| ARFRP1   | selectedExon       | N | NM_001267547.2 |
| BACH1    | selectedExon       | N | NM_001186.3    |
| BBC3     | selectedExon       | N | NM_001127240.2 |
| BCL10    | selectedExon       | N | NM_003921.4    |
| BCL2L11  | Intron             | N | NM_001204107.1 |
| BCL2L2   | selectedExon       | N | NM_001199839.1 |

|           |              |   |                |
|-----------|--------------|---|----------------|
| BTG1      | selectedExon | N | NM_001731.2    |
| CALR      | selectedExon | N | NM_004343.3    |
| CD276     | selectedExon | N | NM_001024736.1 |
| CENPA     | selectedExon | N | NM_001809.3    |
| CRBN      | selectedExon | N | NM_016302.3    |
| CTLA4     | selectedExon | N | NM_005214.4    |
| CTNNA1    | selectedExon | N | NM_001323982.1 |
| CXCR4     | selectedExon | N | NM_003467.2    |
| CYP17A1   | selectedExon | N | NM_000102.3    |
| DCUN1D1   | selectedExon | N | NM_020640.3    |
| DIS3      | selectedExon | N | NM_014953.4    |
| DNAJB1    | selectedExon | N | NM_006145.2    |
| E2F3      | selectedExon | N | NM_001949.4    |
| EED       | selectedExon | N | NM_001308007.1 |
| EGFL7     | selectedExon | N | NM_016215.4    |
| EIF1AX    | selectedExon | N | NM_001412.3    |
| EIF4A2    | selectedExon | N | NM_001967.3    |
| ERCC3     | selectedExon | N | NM_000122.1    |
| ERCC4     | selectedExon | N | NM_005236.2    |
| ERCC5     | selectedExon | N | NM_000123.3    |
| FAM46C    | wholeExon    | N | NM_017709.3    |
| FANCF     | wholeExon    | N | NM_022725.3    |
| FANCM     | selectedExon | N | NM_020937.3    |
| FAS       | selectedExon | N | NM_000043.5    |
| FGF10     | selectedExon | N | NM_004465.1    |
| FGF23     | selectedExon | N | NM_020638.2    |
| FGF6      | selectedExon | N | NM_020996.2    |
| FGF7      | selectedExon | N | NM_002009.3    |
| FOXA1     | selectedExon | N | NM_004496.3    |
| FOXL2     | wholeExon    | N | NM_023067.3    |
| GATA4     | selectedExon | N | NM_001308093.1 |
| GID4      | selectedExon | N | NM_024052.4    |
| GNA13     | selectedExon | N | NM_006572.5    |
| GPS2      | selectedExon | N | NM_004489.4    |
| GREM1     | wholeExon    | N | NM_013372.6    |
| H3F3B     | selectedExon | N | NM_005324.4    |
| H3F3C     | wholeExon    | N | NM_001013699.2 |
| HIST1H1C  | wholeExon    | N | NM_005319.3    |
| HIST1H2BD | wholeExon    | N | NM_021063.3    |
| HIST1H3A  | wholeExon    | N | NM_003529.2    |

|          |              |   |                |
|----------|--------------|---|----------------|
| HIST1H3B | wholeExon    | N | NM_003537.3    |
| HIST1H3C | wholeExon    | N | NM_003531.2    |
| HIST1H3D | wholeExon    | N | NM_003530.4    |
| HIST1H3E | wholeExon    | N | NM_003532.2    |
| HIST1H3G | wholeExon    | N | NM_003534.2    |
| HIST1H3H | wholeExon    | N | NM_003536.2    |
| HIST1H3I | wholeExon    | N | NM_003533.2    |
| HIST1H3J | wholeExon    | N | NM_003535.2    |
| HIST2H3C | selectedExon | N | NM_021059.2    |
| HIST2H3D | wholeExon    | N | NM_001123375.2 |
| HIST3H3  | wholeExon    | N | NM_003493.2    |
| HOXB13   | selectedExon | N | NM_006361.5    |
| HSD3B1   | selectedExon | N | NM_000862.2    |
| ICOSLG   | selectedExon | N | NM_001283050.1 |
| ID3      | selectedExon | N | NM_002167.4    |
| IFNGR1   | selectedExon | N | NM_000416.2    |
| IL10     | selectedExon | N | NM_000572.2    |
| INHA     | selectedExon | N | NM_002191.3    |
| IRS1     | wholeExon    | N | NM_005544.2    |
| JUN      | wholeExon    | N | NM_002228.3    |
| KLF4     | selectedExon | N | NM_001314052.1 |
| KLHL6    | selectedExon | N | NM_130446.2    |
| LYN      | selectedExon | N | NM_002350.3    |
| LZTR1    | selectedExon | N | NM_006767.3    |
| MALT1    | selectedExon | N | NM_006785.3    |
| MAP3K14  | selectedExon | N | NM_003954.4    |
| MAPK1    | selectedExon | N | NM_002745.4    |
| MGA      | selectedExon | N | NM_001164273.1 |
| MYOD1    | selectedExon | N | NM_002478.4    |
| NCOA3    | selectedExon | N | NM_181659.2    |
| NEGR1    | selectedExon | N | NM_173808.2    |
| NKX3-1   | selectedExon | N | NM_006167.3    |
| PARP1    | selectedExon | N | NM_001618.3    |
| PDCD1    | selectedExon | N | NM_005018.2    |
| PDCD1LG2 | selectedExon | N | NM_025239.3    |
| PDK1     | selectedExon | N | NM_001278549.1 |
| PDPK1    | selectedExon | N | NM_002613.4    |
| PHOX2B   | selectedExon | N | NM_003924.3    |
| PIK3C2B  | selectedExon | N | NM_002646.3    |
| PIK3C3   | selectedExon | N | NM_002647.3    |

|           |              |   |                |
|-----------|--------------|---|----------------|
| PIK3R3    | selectedExon | N | NM_001303427.1 |
| PLK2      | selectedExon | N | NM_006622.3    |
| PMAIP1    | selectedExon | N | NM_021127.2    |
| PNRC1     | selectedExon | N | NM_006813.2    |
| POM121L12 | wholeExon    | N | NM_182595.3    |
| PPM1D     | selectedExon | N | NM_003620.3    |
| PRKCI     | selectedExon | N | NM_002740.5    |
| PRSS8     | selectedExon | N | NM_002773.4    |
| RAB35     | selectedExon | N | NM_006861.6    |
| RAD21     | selectedExon | N | NM_006265.2    |
| RANBP2    | selectedExon | N | NM_006267.4    |
| REL       | selectedExon | N | NM_002908.3    |
| RFWD2     | selectedExon | N | NM_022457.6    |
| RHEB      | selectedExon | N | NM_005614.3    |
| RIT1      | selectedExon | N | NM_001256821.1 |
| RPA1      | selectedExon | N | NM_002945.3    |
| RYBP      | selectedExon | N | NM_012234.6    |
| SDHAF2    | selectedExon | N | NM_017841.2    |
| SH2D1A    | selectedExon | N | NM_002351.4    |
| SHQ1      | selectedExon | N | NM_018130.2    |
| SOCS1     | wholeExon    | N | NM_003745.1    |
| SOX10     | selectedExon | N | NM_006941.3    |
| SOX17     | selectedExon | N | NM_022454.3    |
| SOX2      | wholeExon    | N | NM_003106.3    |
| STAT4     | selectedExon | N | NM_001243835.1 |
| SUZ12     | selectedExon | N | NM_015355.3    |
| TACC3     | selectedExon | N | NM_006342.2    |
| TERC      | wholeExon    | N | NR_001566.1    |
| TET1      | selectedExon | N | NM_030625.2    |
| TGFBR1    | selectedExon | N | NM_001306210.1 |
| TIPARP    | selectedExon | N | NM_001184717.1 |
| TMEM127   | selectedExon | N | NM_017849.3    |
| TOP2A     | selectedExon | N | NM_001067.3    |
| VEGFB     | selectedExon | N | NM_003377.4    |
| VEGFC     | selectedExon | N | NM_005429.4    |
| VTCN1     | selectedExon | N | NM_024626.3    |
| WISP3     | selectedExon | N | NM_198239.1    |
| XIAP      | selectedExon | N | NM_001167.3    |
| XRCC3     | selectedExon | N | NM_001100118.1 |
| YAP1      | selectedExon | N | NM_001282101.1 |

---

|       |              |   |             |
|-------|--------------|---|-------------|
| ZBTB2 | selectedExon | N | NM_020861.2 |
| ZRSR2 | selectedExon | N | NM_005089.3 |

---
