# Supplementary material for: Somatic POLE exonuclease domain mutations elicit enhanced intratumoral immune responses in stage II colorectal cancer
Source: PubMed Central journal article supplement (PMC7454238; doi:10.1136/jitc-2020-000881), 2020-08-27
Supplement: jitc-2020-000881supp014.pdf [file jitc-2020-000881supp014.pdf]

Supplementary Table 8. Immunohistochemical multiplex staining protocol.

## Panel 1

| No.                | 1             | 2           | 3          | 4          | 5          |
|--------------------|---------------|-------------|------------|------------|------------|
| Antigen            | <b>CD45RO</b> | <b>PDL1</b> | <b>CD8</b> | <b>CD3</b> | <b>PD1</b> |
| Catalogue number   | ZM-0055       | ZA-0629     | ZA0508     | ZM-0417    | ZM0381     |
| Species            | mouse         | Rabbit      | Rabbit     | Mouse      | Mouse      |
| Concentration      | 1:200         | 1:25        | 1:100      | 1:50       | 1:100      |
| Antigen retrieval  | AR9           | AR9         | AR9        | AR9        | AR9        |
| Incubation         | 37°C 1h       | 37°C 1Hr    | 4°C ON     | 37°C 1Hr   | 37°C 1Hr   |
| Secondary antibody | PV-9000       | PV-8000     | PV-9000    | PV-9000    | PV-8000    |
| TSA                | 620           | 570         | 520        | 690        | 650        |

## Panel 2

| No.                | 1            | 2            | 3           | 4                | 5           |
|--------------------|--------------|--------------|-------------|------------------|-------------|
| Antigen            | <b>FoxP3</b> | <b>CD163</b> | <b>CD68</b> | <b>CD4</b>       | <b>PDL1</b> |
| Catalogue number   | ab20034      | ZM0428       | ZM0060      | ZM0418           | ZA0629      |
| Species            | Mouse        | Mouse        | Mouse       | Mouse            | Rabbit      |
| Concentration      | 1:400        | 1:100        | 1:500       | Working solution | 1:25        |
| Antigen retrieval  | AR9          | AR9          | AR9         | AR9              | AR9         |
| Incubation         | 37°C 1Hr     | 37°C 1Hr     | 4°C ON      | 37°C 1Hr         | 37°C 1Hr    |
| Secondary antibody | PV-9000      | PV-8000      | PV-9000     | PV-8000          | PV-8000     |
| TSA                | 650          | 520          | 690         | 570              | 540         |
